# Supplementary material
Source: PubMed Central journal article supplement (PMC9888525)
Supplement: tg1c00012_si_001.pdf [file tg1c00012_si_001.pdf]

Supporting Information for

**Characterization of the presence and function of platelet opioid receptors**

Sarah M. Gruba,<sup>1,2</sup> Danielle H. Francis,<sup>2</sup> Audrey F. Meyer,<sup>2,3</sup> Eleni Spanolios,<sup>2</sup> Jiayi He,<sup>2</sup> Ben M. Meyer,<sup>2</sup> Donghyuk Kim,<sup>2</sup> Kang Xiong-Hang,<sup>2</sup> and Christy L. Haynes<sup>2\*</sup>

<sup>1</sup>Present address: Boston Scientific, 4100 Hamline Ave N., St. Paul, MN 55112

<sup>2</sup>Department of Chemistry, University of Minnesota, Minneapolis, MN 55455

<sup>3</sup>Present address: Boston Scientific, 3 Scimed Place, Maple Grove, MN 55311

\*Corresponding Author E-mail: chaynes@umn.edu

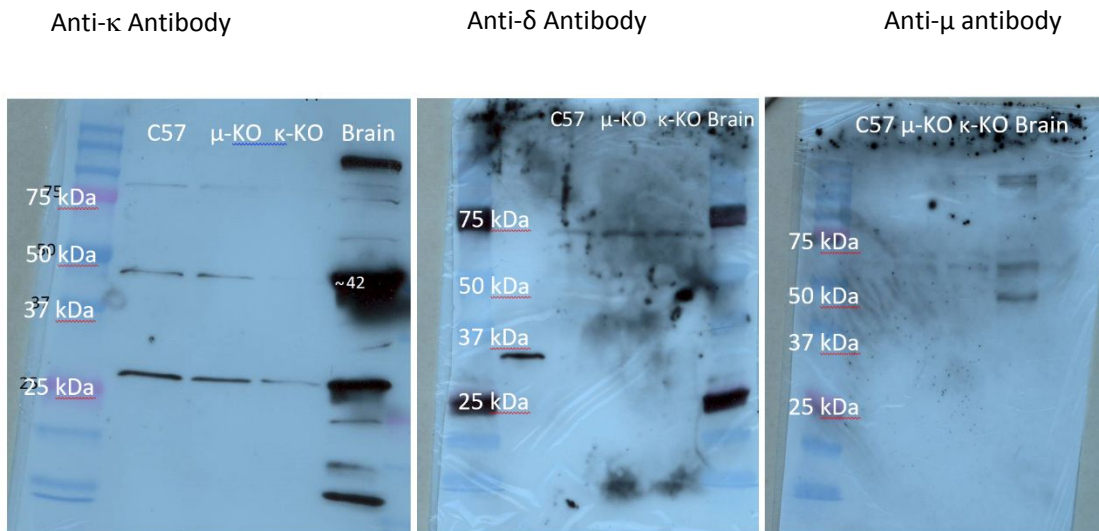

Figure SI 1: Western blots of knockout mouse platelets incubated with (A) anti- $\kappa$ , (B) anti- $\delta$ , and (C) anti- $\mu$  antibodies. The anti- $\mu$  antibody used in the blots shown here was the one sourced from Millipore Sigma. The blot membrane was overlaid with the x-ray film before scanning. Numbers and labels were added to the images.

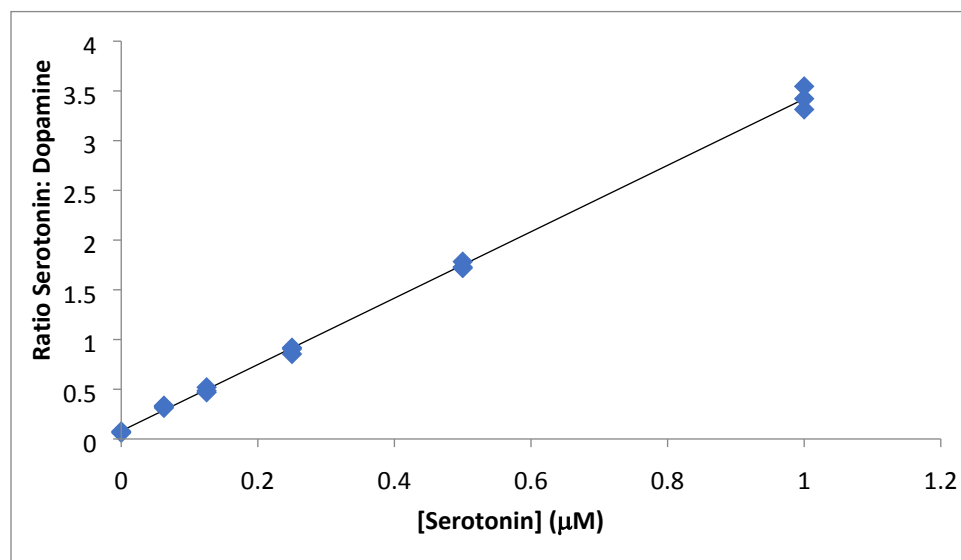

**Figure SI 2.** The calibration curve was constructed by plotting the ratio of the serotonin peak: dopamine peak (internal standard) from measured HPLC chromatograms. The serotonin calibration curve was made using three replicates of known serotonin concentrations (0.0, 0.0625, 0.125, 0.25, 0.5, and 1 µM). This calibration curve was used to calculate the limit of detection (0.017 µM) and limit of quantification (0.052 µM) for this method.

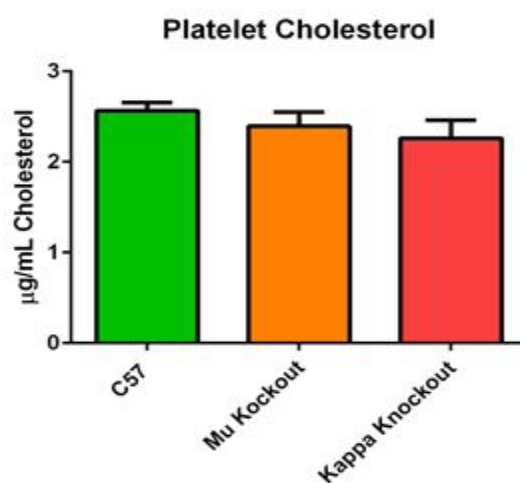

**Figure SI 3:** Comparison of cholesterol concentrations in platelets from control C57, µ-KO and κ-KO mice. No statistical significance was noted.

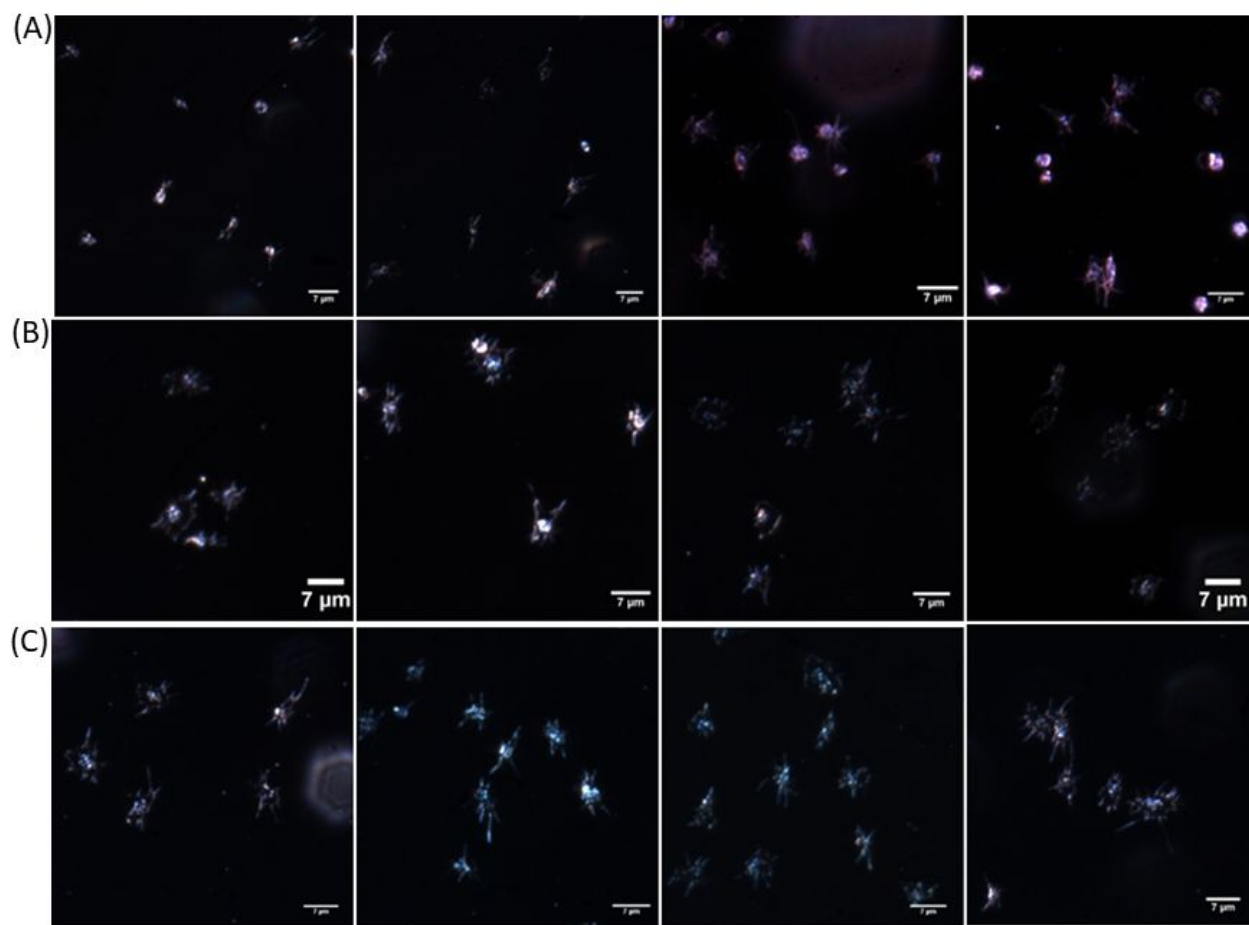

**Figure SI 4:** Dark-field images of representative activated (A) C-57 platelets, (B)  $\kappa$ -KO platelets, and (C)  $\mu$ -KO platelets. The scale bar in all images represents 7  $\mu\text{m}$ .
